# Supplementary material for: Self-Limited versus Delayed Resolution of Acute Inflammation: Temporal Regulation of Pro-Resolving Mediators and MicroRNA
Source: PubMed Central journal article supplement — Sci Rep. 2012 Sep 6;2:639. doi: 10.1038/srep00639 (PMC3434392; doi:10.1038/srep00639), 2012-09-06
Supplement: srep00639-s1.pdf [file srep00639-s1.pdf]

## Supplementary Information

### Self-Limited versus Delayed Resolution of Acute Inflammation: Temporal Regulation of Pro-Resolving Mediators and MicroRNA

Gabrielle Fredman\*, Yongsheng Li\*, Jesmond Dalli, Nan Chiang,  
Charles N. Serhan

Center for Experimental Therapeutics and Reperfusion Injury,  
Harvard institutes of Medicine,  
Department of Anesthesiology, Perioperative, and Pain Medicine,  
Brigham and Women's Hospital, and  
Harvard Medical School, Boston, MA, 02115

\*Gabrielle Fredman and Yongsheng Li share first authorship and contributed  
equally to this work

Figure S1

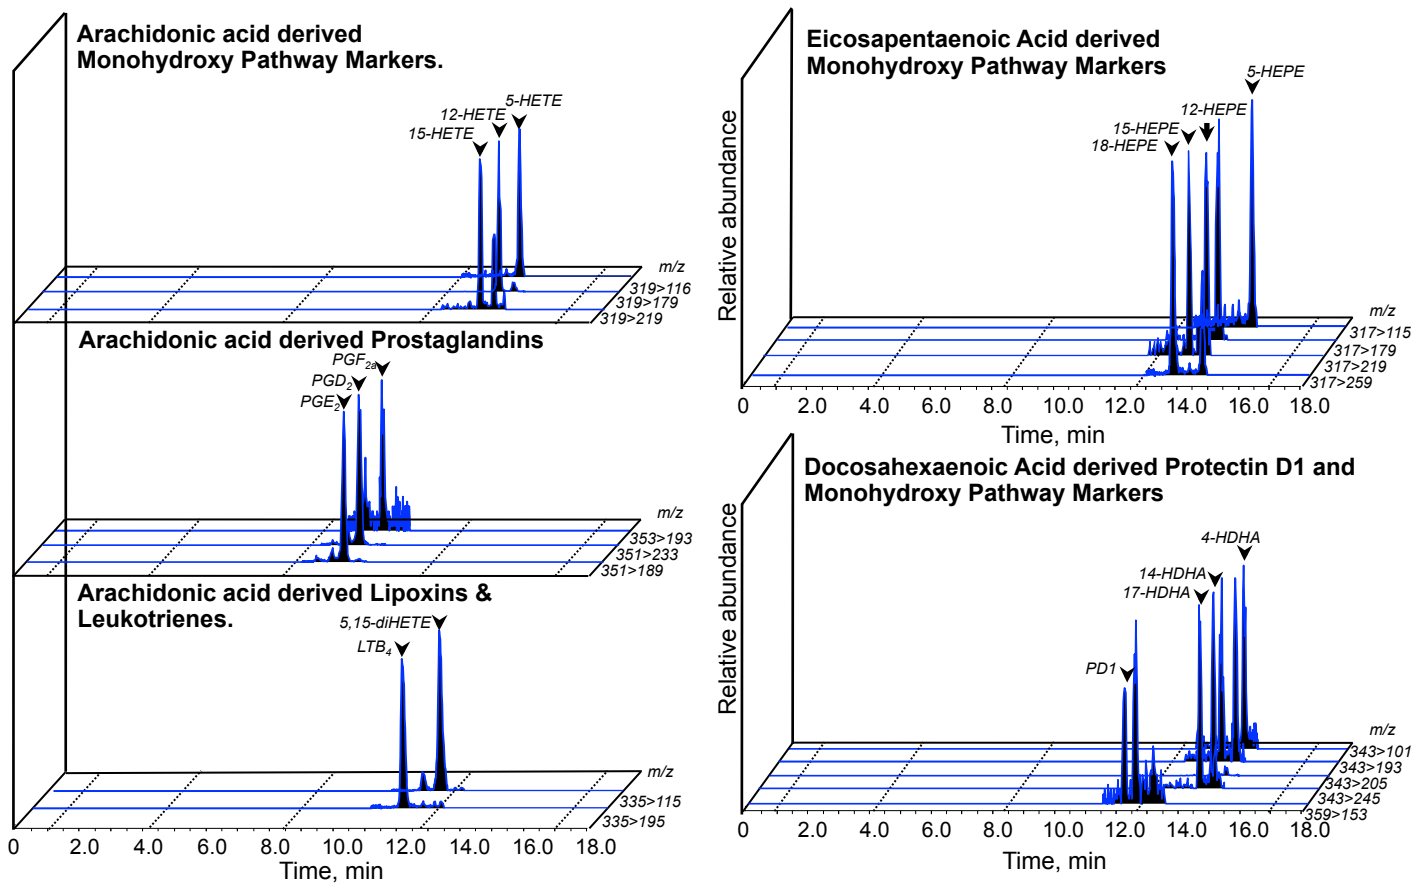

Figure S1. Representative chromatograms for LMs for peritoneal exudates harvested 4hrs post zymosan initiation. Representative MRM chromatograms for the identified LM. Peak heights represent the relative levels of each mediator in the exudates. Left panel, arachidonic acid derived LMs. Right panel, eicosapentaenoic acid (top) and docosahexaenoic acid (bottom) derived mediators.

Figure S2

a

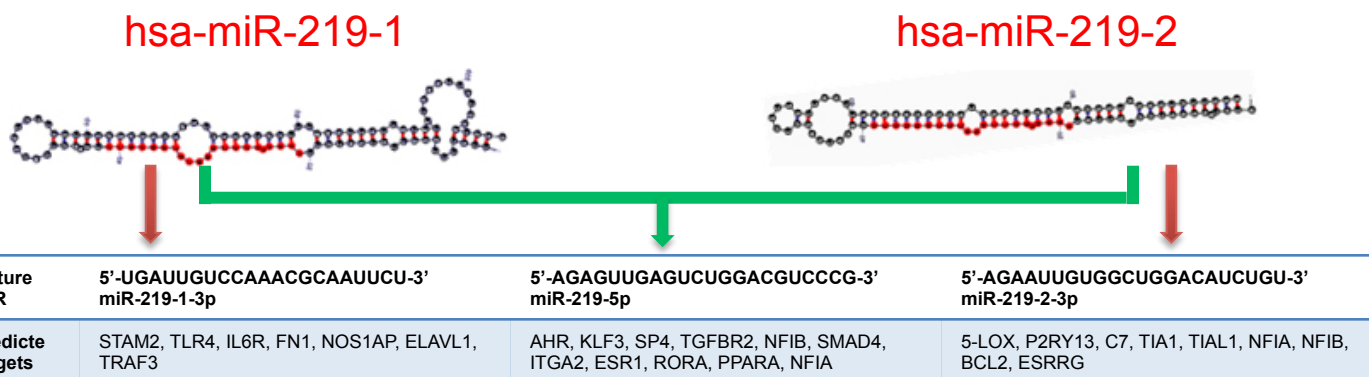

b

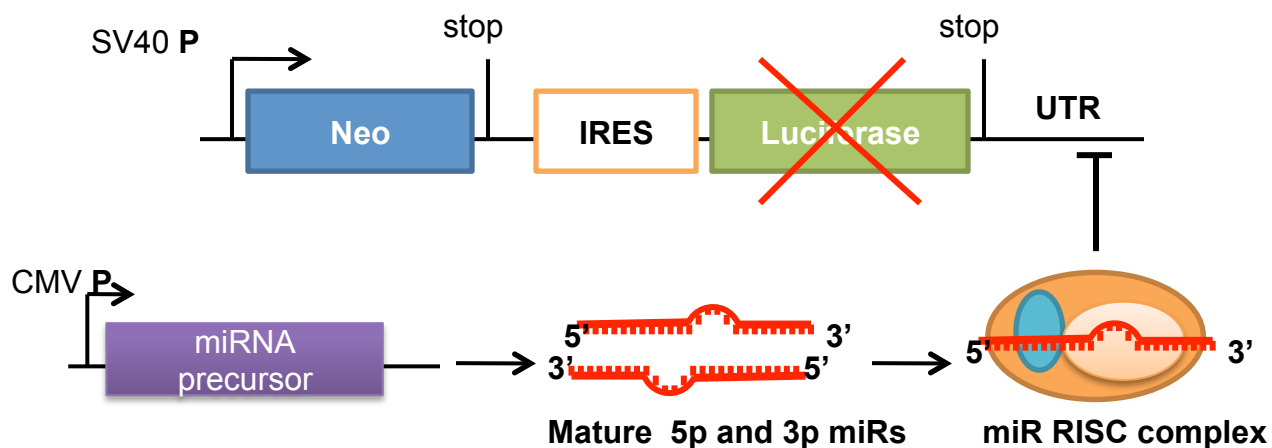

c

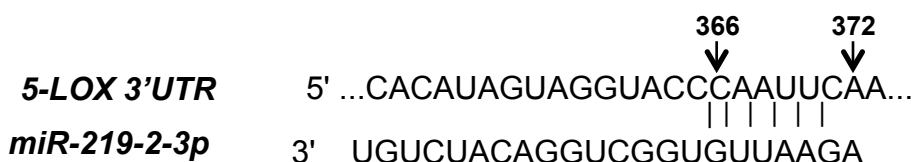

Figure S2. miR-219-1 and miR-219-2 are distinct miRNAs. (a) Scheme of the difference between miR-219-1 and miR-219-2. Each miR-219 predicted gene targets distinct from each other. (b) Scheme of 3'UTR experiment whereby luminescence will be decreased if direct binding of the miR with the 3'UTR occurs. (c) Predicted sequence binding of miR-219-2-3p with human 5-LOX.

Figure S3

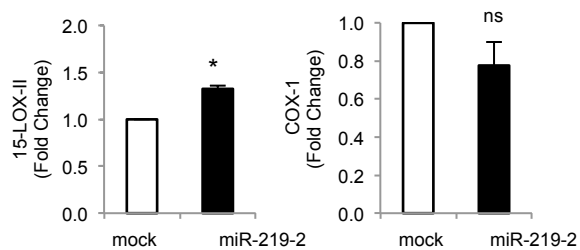

Figure S3 miR-219-2 modulation of 15-LOX-II.

Human macrophages were transfected with either mock or miR-219-2 (72 hrs, 37° C). mRNAs were isolated and analyzed using qPCR. (a) 15-LOX-II, (b) COX-1.

Results are mean  $\pm$  SEM of n=6 donors. \*P<0.05, mock vs. miR-219-2.

**Table S1. Lipid mediator profiles in self-limited versus delayed resolution exudates\***

| <i>Compound</i>         | <b>Q1</b>  | <b>Q3</b>  | <i>1mg Zym 4h (pg/exudate)</i> | <i>10 mg Zym 4h (pg/exudate)</i> |
|-------------------------|------------|------------|--------------------------------|----------------------------------|
| <b>5-HETE</b>           | <b>319</b> | <b>116</b> | 2,711 ± 365                    | 14,068 ± 1,773                   |
| <b>12-HETE</b>          | <b>319</b> | <b>179</b> | 4,844 ± 1576                   | 2,833 ± 542                      |
| <b>15-HETE</b>          | <b>319</b> | <b>219</b> | 1,097 ± 101                    | 3,129 ± 232                      |
| <b>4-HDHA</b>           | <b>343</b> | <b>101</b> | 16,491 ± 5,222                 | 40,818 ± 2,649                   |
| <b>7-HDHA</b>           | <b>343</b> | <b>141</b> | 245 ± 46                       | 2,614 ± 147                      |
| <b>14-HDHA</b>          | <b>343</b> | <b>205</b> | 3,471 ± 1,880                  | 2,082 ± 662                      |
| <b>17-HDHA</b>          | <b>343</b> | <b>245</b> | 1,524 ± 494                    | 1,493 ± 200                      |
| <b>5-HEPE</b>           | <b>317</b> | <b>115</b> | 6,036 ± 620                    | 22,799 ± 3,531                   |
| <b>12-HEPE</b>          | <b>317</b> | <b>179</b> | 468 ± 177                      | 210 ± 40                         |
| <b>15-HEPE</b>          | <b>317</b> | <b>219</b> | 354 ± 115                      | 142 ± 36                         |
| <b>18-HEPE</b>          | <b>317</b> | <b>259</b> | 441 ± 121                      | 490 ± 149                        |
| <b>LTB<sub>4</sub></b>  | <b>335</b> | <b>195</b> | 741 ± 168                      | 12,070 ± 1,904                   |
| <b>LXA<sub>4</sub></b>  | <b>351</b> | <b>115</b> | 70 ± 25                        | 289 ± 67                         |
| <b>5,15-diHETE</b>      | <b>335</b> | <b>115</b> | 225 ± 67                       | 981 ± 136                        |
| <b>PGF<sub>2a</sub></b> | <b>353</b> | <b>193</b> | 461 ± 43                       | 1,358 ± 190                      |
| <b>PGD<sub>2</sub></b>  | <b>351</b> | <b>233</b> | 1,416 ± 125                    | 3,319 ± 466                      |
| <b>PGE<sub>2</sub></b>  | <b>351</b> | <b>189</b> | 2,073 ± 316                    | 6,739 ± 1,089                    |
| <b>RvD1</b>             | <b>375</b> | <b>215</b> | 23 ± 10                        | 8 ± 1                            |
| <b>RvD2</b>             | <b>375</b> | <b>175</b> | *                              | *                                |
| <b>PD1</b>              | <b>359</b> | <b>153</b> | 1,140 ± 330                    | 324 ± 108                        |
| <b>RvD5</b>             | <b>359</b> | <b>199</b> | 177 ± 93                       | 86 ± 25                          |
| <b>RvD6</b>             | <b>359</b> | <b>101</b> | 63 ± 30                        | 45 ± 21                          |

\*LC-MS-MS-based LM metabololipidomics were carried out with self-limited or delayed resolution lavage exudates collected at 4 hours after zymosan injection. The detection limits were ~10 pg. (\*) denotes below limits of detection. Lipid mediators were profiled using multiple reaction monitoring (MRM) and identified by direct comparison with synthetic and authentic standards using matching criteria including retention times and 6 diagnostic ions. Q1: M-H (parent ion), Q3: A diagnostic ion in the MS-MS (daughter ion). Q1-Q3 ion pairs were used for quantification. Specific bioactive lipid mediator and precursor/pathway markers are expressed as mean ± SEM, n=4 separate murine lavage exudates for each of the mediators.

**Table S2. Lipid mediator profiles in self-limited versus delayed resolution exudates with or without apoptotic PMN \***

| <i>Compound</i>         | <b>Q1</b>  | <b>Q3</b>  | Self-limited |                 | Delayed Resolution |                 |
|-------------------------|------------|------------|--------------|-----------------|--------------------|-----------------|
|                         |            |            | <i>Zym</i>   | <i>Zym + AP</i> | <i>Zym</i>         | <i>Zym + AP</i> |
| <b>5-HETE</b>           | <b>319</b> | <b>116</b> | 233 ± 57     | 165 ± 47        | 498 ± 53           | 319 ± 66        |
| <b>12-HETE</b>          | <b>319</b> | <b>179</b> | 1,870 ± 867  | 1,347 ± 84      | 1,310 ± 250        | 2,183 ± 302     |
| <b>15-HETE</b>          | <b>319</b> | <b>219</b> | 389 ± 87     | 815 ± 284       | 3,512 ± 400        | 4,860 ± 831     |
| <b>4-HDHA</b>           | <b>343</b> | <b>101</b> | 192 ± 47     | 200 ± 43        | 302 ± 45           | 173 ± 11        |
| <b>7-HDHA</b>           | <b>343</b> | <b>141</b> | 64 ± 12      | 60 ± 14         | 108 ± 24           | 89 ± 23         |
| <b>14-HDHA</b>          | <b>343</b> | <b>205</b> | 1,392 ± 803  | 750 ± 252       | 928 ± 174          | 1,673 ± 132     |
| <b>17-HDHA</b>          | <b>343</b> | <b>245</b> | 185 ± 26     | 186 ± 38        | 490 ± 61           | 466 ± 71        |
| <b>5-HEPE</b>           | <b>317</b> | <b>115</b> | 2,425 ± 568  | 2,077 ± 572     | 3,414 ± 432        | 2,062 ± 308     |
| <b>12-HEPE</b>          | <b>317</b> | <b>179</b> | 330 ± 139    | 163 ± 50        | 222 ± 22           | 98 ± 18         |
| <b>15-HEPE</b>          | <b>317</b> | <b>219</b> | 72 ± 4       | 75 ± 15         | 161 ± 13           | 142 ± 16        |
| <b>18-HEPE</b>          | <b>317</b> | <b>259</b> | 214 ± 22     | 165 ± 48        | 312 ± 24           | 184 ± 39        |
| <b>LTB<sub>4</sub></b>  | <b>335</b> | <b>195</b> | 10 ± 0.8     | 2.5 ± 1.3 §     | 25 ± 2             | 14 ± 3 #        |
| <b>LXA<sub>4</sub></b>  | <b>351</b> | <b>115</b> | *            | *               | *                  | *               |
| <b>5,15-diHETE</b>      | <b>335</b> | <b>115</b> | 1.8 ± 1.0    | 4.0 ± 1.4 *     | 56.9 ± 11.0        | 98.2 ± 4.3 #    |
| <b>PGF<sub>2a</sub></b> | <b>353</b> | <b>193</b> | 73 ± 8       | 216 ± 33        | 790 ± 108          | 1,274 ± 472     |
| <b>PGD<sub>2</sub></b>  | <b>351</b> | <b>233</b> | 5 ± 1        | 498 ± 95 §§     | 151 ± 43           | 1,279 ± 558 #   |
| <b>PGE<sub>2</sub></b>  | <b>351</b> | <b>189</b> | 308 ± 47     | 536 ± 196       | 2,801 ± 174        | 2,929 ± 240     |
| <b>RvD1</b>             | <b>375</b> | <b>215</b> | *            | *               | *                  | *               |
| <b>RvD2</b>             | <b>375</b> | <b>175</b> | *            | *               | *                  | *               |
| <b>PD1</b>              | <b>359</b> | <b>153</b> | 22.4 ± 4.4   | 40.6 ± 6.9 §    | 15.5 ± 1.3         | 78.5 ± 18.0 #   |
| <b>RvD5</b>             | <b>359</b> | <b>199</b> | *            | *               | *                  | *               |
| <b>RvD6</b>             | <b>359</b> | <b>101</b> | 18 ± 12      | *               | 37 ± 4             | 31 ± 10         |

\*LC-MS-MS-based LM metabololipidomics were carried out with self-limited or delayed resolution lavage exudates collected at 24 hours after zymosan injection. The detection limits were ~10 pg. (\*) denotes below limits of detection. Lipid mediators were profiled using multiple reaction monitoring (MRM) and identified by direct comparison with synthetic and authentic standards using matching criteria including retention times and 6 diagnostic ions. Q1: M-H (parent ion), Q3: A diagnostic ion in the MS-MS (daughter ion). Q1-Q3 ion pairs were used for quantification. Specific bioactive lipid mediator and precursor/pathway markers are expressed as mean ± SEM, n=4 separate murine lavage exudates for each of the mediators identified. §p<0.05, §§p<0.01 Self-limited zymosan (Zym) versus self-limited zymosan plus apoptotic PMN (Apop PMN). #p<0.05 Delayed resolution zymosan versus delayed resolution zymosan plus apoptotic PMN.

**Table S3A. Primer designed and used for *in vitro* and *in vivo* experiments**

| <b>Genes</b>   | <b>Forward (5'→3')</b>    | <b>Reverse (5'→3')</b> |
|----------------|---------------------------|------------------------|
| Human 5-LOX    | GGAAACACGGCAAAAACA        | ATCGATGCTCAAGGGGAAG    |
| Human LTA4H    | CCACCATCCTTCCCTTAT        | AAACAATCGTCCGCAAAT     |
| Human 12-LOX   | GATGATCTACCTCCAAATATG     | CTGGCCCCAGAAGATCTGATC  |
| Human 15-LOX   | GACCGAGGGTTTCTGTCTC       | TGTCTCCAGCGTTGCATCC    |
| Human 15-LOX-2 | GATCTTCAACTTCCGGAGGAC     | ACTGGGAGGCGAAGAAGG     |
| Human GAPDH    | AGCCACATCGCTCAGACAC       | GCCCAATACGACCAAATCC    |
| Mouse 5-LOX    | GGCACGGGAAAAACAGTATC      | TGGCATTGGCATCAATACTC   |
| Mouse PTGS2    | AAGGAACTCAGCACTGCATCC     | ACAGGGATTGGAACAGCAAGGA |
|                |                           |                        |
|                | <b>Qiagen Catalog No.</b> |                        |
| RNAU1A         | MS00013986                |                        |
| miR-219-5p     | MS00006776                |                        |
| miR-219-2-3p   | MS00009135                |                        |
| miR-21         | MS00009079                |                        |
| miR-146b-5p    | MS00003542                |                        |
| miR-208a       | MS00003794                |                        |
|                |                           |                        |
| Human PTGS1    | QT00210280                |                        |
| Human PTGS2    | QT00040586                |                        |
| Human HPGD     | QT00013454                |                        |

**Table S3B. Commercial human antibodies used for flow cytometry**

| <b>Antibodies</b>                                 | <b>Company</b>                      | <b>Catlog No.</b> |
|---------------------------------------------------|-------------------------------------|-------------------|
| <b>5-LOX</b>                                      | Cell Signaling Technology           | 3289              |
| <b>COX-2</b>                                      | Cayman Chemical                     | 160113            |
| <b>12-LOX</b>                                     | Novus Biologicals                   | H00000239-M01     |
| <b>15-LOX-I</b>                                   | Origene                             | TA504358          |
| <b>LTA4H</b>                                      | Origene                             | TA500663          |
| <b>PGDH</b>                                       | Novus Biologicals                   | NB200-179G        |
| <b>Alexa Fluor 647-conjugated anti-Rabbit IgG</b> | Jackson ImmunoResearch Laboratories | 111-605-003       |
